# Supplementary material for: Kinetics and optimization studies of modified VPO/γ-Al2O3 catalyst prepared in situ for cross-aldol condensation
Source: Royal Society of Chemistry journal article supplement (doi:10.1039/d3cy00844d), 2023-01-01
Supplement: d3cy00844d1.pdf [file d3cy00844d1.pdf]

## Kinetics and Optimization Studies of Modified VPO/ $\gamma$ -Al<sub>2</sub>O<sub>3</sub> Catalyst

### Prepared In situ for Cross-aldol Condensation

Hui Guo<sup>1</sup>, Tingting Ge<sup>1,\*</sup>, Yuchao Li<sup>1</sup>, Yuxia Li<sup>1</sup>, Yanxia Zheng<sup>1</sup>, Xinpeng Guo<sup>2</sup>, Haofei

Huang<sup>1</sup>, Ming Wang<sup>1</sup>, Cuncun Zuo<sup>1,\*</sup>

<sup>1</sup> Institute of Clean Chemical Technology, School of Chemistry and Chemical Engineering, Shandong University of Technology, Zibo 255000, People's Republic of China

<sup>2</sup> National & Local United Engineering Research Center for Chemical Process Simulation and Intensification, School of Chemical Engineering, Xiangtan University, Xiangtan 411105, People's Republic of China

\*Corresponding author: Cuncun Zuo. TEL/FAX: +86-0533-2781664; E-mail: zcc\_xtu@163.com

Tingting Ge. TEL/FAX: +86-0533-2781664; E-mail: gtt\_swpu@163.com

## Results and Discussion

### Materials characterization

**Table S1** The crystallite size of catalyst with different active component loadings.

| catalyst                                         | average crystal size<br>(nm)                    |                   |
|--------------------------------------------------|-------------------------------------------------|-------------------|
|                                                  | (VO) <sub>2</sub> P <sub>2</sub> O <sub>7</sub> | AlPO <sub>4</sub> |
| 20%VPO/ $\gamma$ -Al <sub>2</sub> O <sub>3</sub> | 17.4                                            | 26.7              |
| 40%VPO/ $\gamma$ -Al <sub>2</sub> O <sub>3</sub> | 17.6                                            | 24.1              |
| 50%VPO/ $\gamma$ -Al <sub>2</sub> O <sub>3</sub> | 18.1                                            | 23.6              |
| 60%VPO/ $\gamma$ -Al <sub>2</sub> O <sub>3</sub> | 18.3                                            | 23.4              |
| 80%VPO/ $\gamma$ -Al <sub>2</sub> O <sub>3</sub> | 21.5                                            | 35.6              |

**Table S2** The crystallite size of catalyst with different calcination temperatures.

| catalyst                                                | average crystal size<br>(nm)                    |                   |                   |
|---------------------------------------------------------|-------------------------------------------------|-------------------|-------------------|
|                                                         | (VO) <sub>2</sub> P <sub>2</sub> O <sub>7</sub> | VOPO <sub>4</sub> | AlPO <sub>4</sub> |
| 60%VPO/ $\gamma$ -Al <sub>2</sub> O <sub>3</sub> -270°C | 17.4                                            | 19.6              | 26.7              |
| 60%VPO/ $\gamma$ -Al <sub>2</sub> O <sub>3</sub> -300°C | 17.6                                            | 17.8              | 24.1              |
| 60%VPO/ $\gamma$ -Al <sub>2</sub> O <sub>3</sub> -350°C | 18.1                                            | 16.4              | 23.6              |
| 60%VPO/ $\gamma$ -Al <sub>2</sub> O <sub>3</sub> -450°C | 18.3                                            | 20.1              | 23.4              |

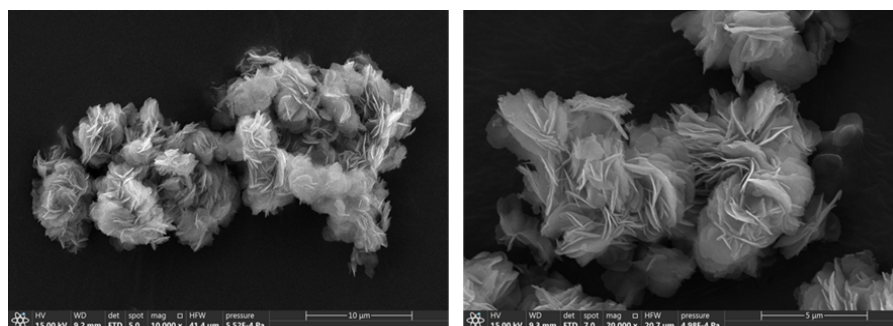

**Figure S1** The SEM images of VPO catalyst.

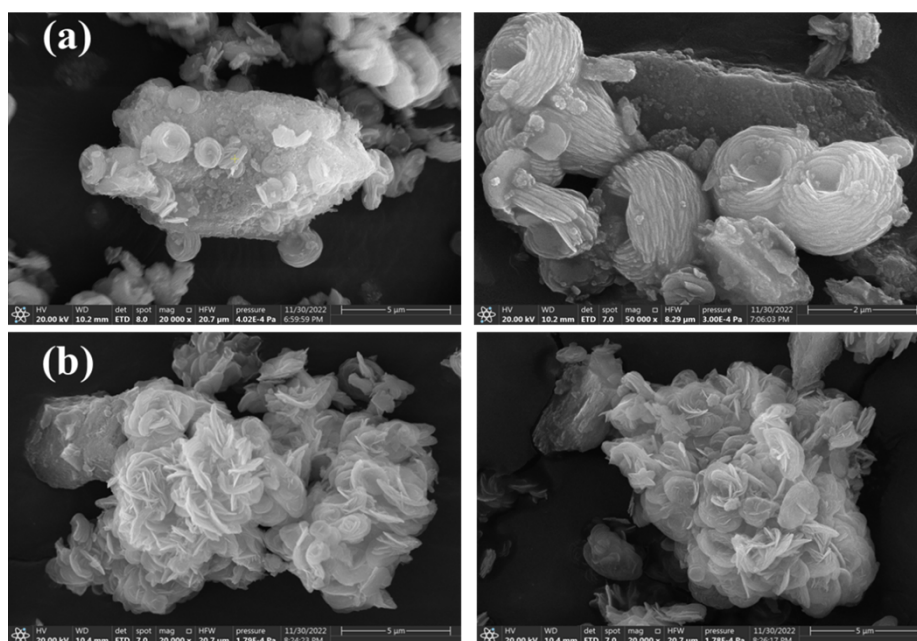

**Figure S2** The SEM images of (a) 20% VPO/ $\gamma$ -Al<sub>2</sub>O<sub>3</sub> and 80% VPO/ $\gamma$ -Al<sub>2</sub>O<sub>3</sub> catalyst.

**Table S3** The amounts of acid and base sites of the VPO/ $\gamma$ -Al<sub>2</sub>O<sub>3</sub> catalysts with different calcination temperature and different active component loadings.

| Catalyst                                               | Weak basic sites<br>(mmol/m <sup>2</sup> ) | Medium-strong acidic sites<br>(mmol/m <sup>2</sup> ) |
|--------------------------------------------------------|--------------------------------------------|------------------------------------------------------|
| 270°C-60%VPO/ $\gamma$ -Al <sub>2</sub> O <sub>3</sub> | 0.0215                                     | 0.0227                                               |
| 350°C-60%VPO/ $\gamma$ -Al <sub>2</sub> O <sub>3</sub> | 0.0254                                     | 0.0265                                               |
| 450°C-60%VPO/ $\gamma$ -Al <sub>2</sub> O <sub>3</sub> | 0.0250                                     | 0.0259                                               |
| 350°C-40%VPO/ $\gamma$ -Al <sub>2</sub> O <sub>3</sub> | 0.0241                                     | 0.0245                                               |
| 350°C-80%VPO/ $\gamma$ -Al <sub>2</sub> O <sub>3</sub> | 0.0256                                     | 0.0266                                               |

**Table S4** Basic parameters of IR absorption peaks at about 3450 cm<sup>-1</sup> and 1600 cm<sup>-1</sup> for VPO/ $\gamma$ -Al<sub>2</sub>O<sub>3</sub> catalysts with different active component loadings.

| catalyst                                         | 3450cm <sup>-1</sup> (H-OH) |           |        | 1600cm <sup>-1</sup> (H-OH) |           |       |
|--------------------------------------------------|-----------------------------|-----------|--------|-----------------------------|-----------|-------|
|                                                  | Peak height                 | Peak area | FWHM   | Peak height                 | Peak area | FWHM  |
| 20%VPO/ $\gamma$ -Al <sub>2</sub> O <sub>3</sub> | 34.61                       | 25730.85  | 701.07 | 12.12                       | 911.03    | 71.86 |
| 40%VPO/ $\gamma$ -Al <sub>2</sub> O <sub>3</sub> | 37.54                       | 28174.61  | 649.53 | 13.64                       | 949.50    | 74.47 |
| 60%VPO/ $\gamma$ -Al <sub>2</sub> O <sub>3</sub> | 42.12                       | 33699.10  | 687.46 | 17.56                       | 1313.92   | 85.26 |
| 80%VPO/ $\gamma$ -Al <sub>2</sub> O <sub>3</sub> | 40.60                       | 30186.42  | 714.28 | 15.09                       | 1112.81   | 87.75 |

**Table S5** CO<sub>2</sub> desorption temperature of catalysts with different active component loadings.

| Catalyst                                         | Temperature of the desorption peak (°C) |
|--------------------------------------------------|-----------------------------------------|
| 40%VPO/ $\gamma$ -Al <sub>2</sub> O <sub>3</sub> | 113.2                                   |
| 60%VPO/ $\gamma$ -Al <sub>2</sub> O <sub>3</sub> | 102.4                                   |
| 80%VPO/ $\gamma$ -Al <sub>2</sub> O <sub>3</sub> | 91.7                                    |

The results of ICP analysis of VPO/Al<sub>2</sub>O<sub>3</sub> catalysts were shown in Table S6. The elemental contents of V, P, and Al in the used VPO/ $\gamma$ -Al<sub>2</sub>O<sub>3</sub> catalyst were similar to those in the fresh catalyst. It indicated that the catalyst components were not lost during the reaction process.

**Table S6** Estimation of V, P, Al contents from ICP-OES in 60%VPO/Al<sub>2</sub>O<sub>3</sub> catalyst.

| Catalyst                                         | Test items | Fresh catalyst | Used catalyst |
|--------------------------------------------------|------------|----------------|---------------|
| 60%VPO/ $\gamma$ -Al <sub>2</sub> O <sub>3</sub> | V          | 16.5%          | 16.5%         |
|                                                  | P          | 12.1%          | 12.0%         |
|                                                  | Al         | 26.8%          | 26.5%         |

## Response surface analysis

Table S7 The experimental design and response values.

| Run | Factor 1<br>A:Molar ratio | Factor 2<br>B:Temperature<br>°C | Factor 3<br>C:Space velocity<br>h <sup>-1</sup> | Response 1 |
|-----|---------------------------|---------------------------------|-------------------------------------------------|------------|
| 1   | 5                         | 350                             | 1.2                                             | 52.21      |
| 2   | 5                         | 330                             | 1.6                                             | 32.74      |
| 3   | 7                         | 350                             | 0.8                                             | 47.21      |
| 4   | 3                         | 350                             | 0.8                                             | 42.27      |
| 5   | 3                         | 350                             | 1.6                                             | 40.52      |
| 6   | 5                         | 370                             | 1.6                                             | 31.17      |
| 7   | 5                         | 350                             | 1.2                                             | 52.14      |
| 8   | 5                         | 350                             | 1.2                                             | 51.85      |
| 9   | 3                         | 370                             | 1.2                                             | 26.74      |
| 10  | 5                         | 370                             | 0.8                                             | 31.74      |
| 11  | 5                         | 350                             | 1.2                                             | 52.05      |
| 12  | 7                         | 330                             | 1.2                                             | 33.44      |
| 13  | 3                         | 330                             | 1.2                                             | 29.54      |
| 14  | 5                         | 330                             | 0.8                                             | 36.72      |
| 15  | 5                         | 350                             | 1.2                                             | 52.37      |
| 16  | 7                         | 370                             | 1.2                                             | 30.55      |
| 17  | 7                         | 350                             | 1.6                                             | 44.71      |

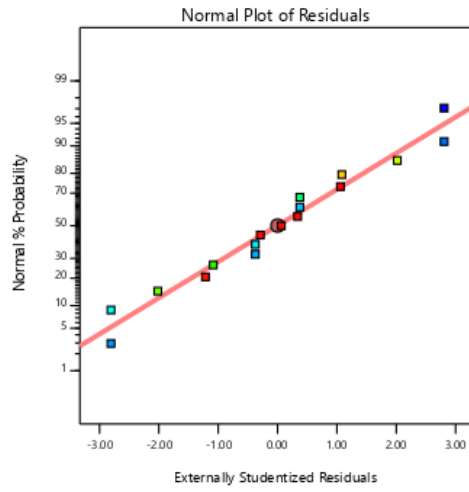

**Figure S3** Normal probability plot.

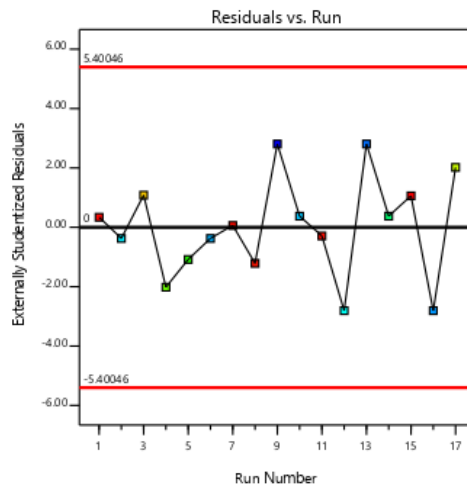

**Figure S4** Run order residual plot.

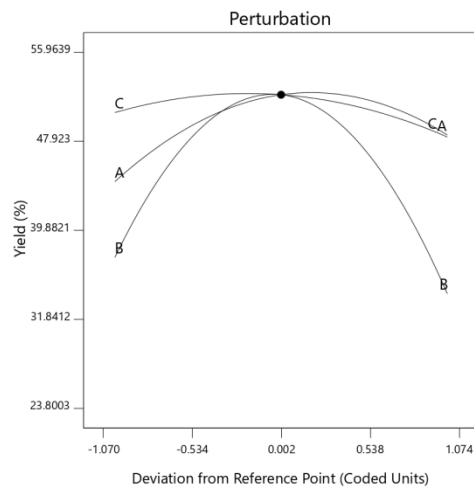

**Figure S5** Perturbation curve.

## Aldol condensation reaction kinetics

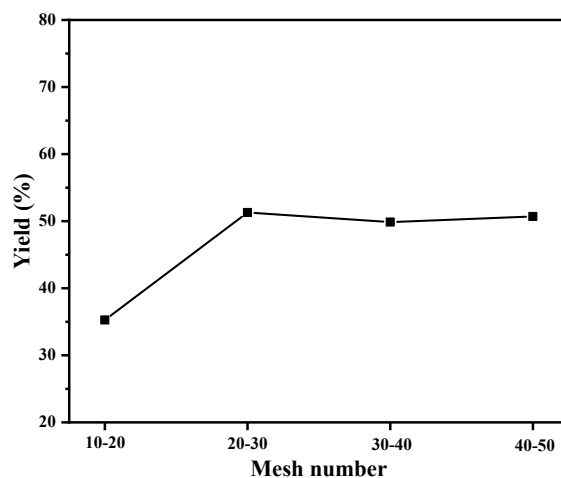

**Figure S6** Effect of catalyst particle size on catalytic performance.

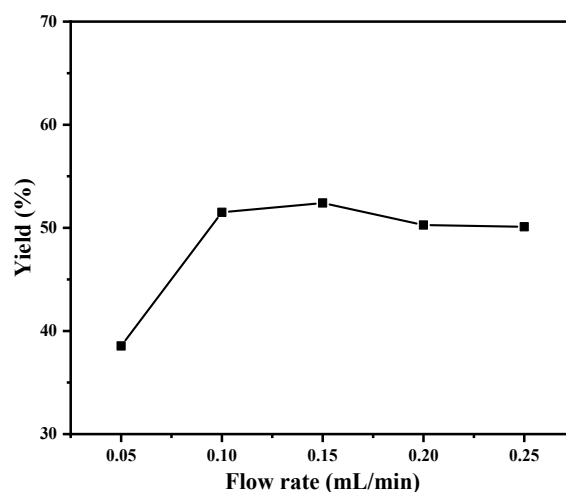

**Figure S7** Effect of flow rate on catalytic performance.

Figure S6 showed the effect of catalyst size on the performance of the reaction, with the yield of AA remaining essentially constant for catalyst sizes  $d > 20$  mesh. It is suggested that the effect of catalyst particle size on internal diffusion can be eliminated for catalyst particle sizes  $d > 20$  mesh. The effect of different flow rate on the yield of AA was investigated in Figure S7 AA yield remained constant at feed flow rate above 0.1 mL/min, which eliminated the effect of external diffusion on aldol condensation reaction.

**Table S8** Variation of HCHO concentration with reaction time at different temperature.

| LHSV<br>(h <sup>-1</sup> ) | Reaction time<br>(min) | C <sub>HCHO</sub><br>(603 K) | C <sub>HCHO</sub><br>(623 K) | C <sub>HCHO</sub><br>(643 K) | C <sub>HCHO</sub><br>(663 K) |
|----------------------------|------------------------|------------------------------|------------------------------|------------------------------|------------------------------|
| 1.5                        | 40                     | 1.550                        | 1.358                        | 1.205                        | 1.112                        |
| 1.7                        | 35                     | 1.663                        | 1.483                        | 1.330                        | 1.260                        |
| 2                          | 30                     | 1.794                        | 1.618                        | 1.465                        | 1.395                        |
| 2.4                        | 25                     | 1.912                        | 1.778                        | 1.645                        | 1.555                        |
| 3                          | 20                     | 2.087                        | 1.974                        | 1.849                        | 1.790                        |

**Table S9** Values and correlations of the parameters in the fitted equation.

|       | y <sub>0</sub> | A <sub>1</sub> | t <sub>1</sub> | R <sup>2</sup> |
|-------|----------------|----------------|----------------|----------------|
| 603 K | 0.72840        | 2.22490        | 40.27950       | 0.998          |
| 623 K | 0.67265        | 2.45744        | 31.40538       | 0.999          |
| 643 K | 0.60738        | 2.57653        | 27.41172       | 0.999          |
| 663 K | 0.50863        | 2.65359        | 27.28710       | 0.997          |

**Table. S10** Values and correlations of the parameters in the fitted equation.

|       | lnk     | α      | R <sup>2</sup> |
|-------|---------|--------|----------------|
| 603 K | -4.6243 | 1.6866 | 0.997          |
| 623 K | -4.3366 | 1.7103 | 0.998          |
| 643 K | -4.1290 | 1.7047 | 0.997          |
| 663 K | -3.9623 | 1.5715 | 0.997          |

The effect of reaction temperature (330-390 °C) and space velocity on aldil condensation reaction was studied in a fixed bed reactor and the variation of HCHO concentration at different reaction time is shown in Table S2. Table S3 demonstrated the parameters of the equation and their correlation coefficients after fitting the equation to  $C_{\text{HCHO}} \sim t$  at different temperature. Table S4 showed the parameters of the equation and their correlation coefficients after fitting the equation to  $\ln C_{\text{HCHO}} \sim \ln r_A$  at different temperature.
